# Supplementary material for: Hydrogen-bond-rich ionic liquids as effective organocatalysts for Diels–Alder reactions
Source: Royal Society of Chemistry journal article supplement (doi:10.1039/c4gc00380b), 2014-01-01

Supplementary Information

Green Chemistry

## Hydrogen-bond-rich ionic liquids as effective organocatalysts for Diels-Alder reaction

Karol Erfurt<sup>a</sup>, Iлона Wandzik<sup>a</sup>, Krzysztof Walczak<sup>a</sup>, Karolina Matuszek<sup>a</sup> and Anna Chrobok<sup>\*a</sup>

<sup>a</sup> *Silesian University of Technology, Faculty of Chemistry, ul. Krzywoustego 4, 44-100 Gliwice, Poland. Fax: 48 322371032; Tel: 48 322372917;  
E-mail: anna.chrobok@polsl.pl*

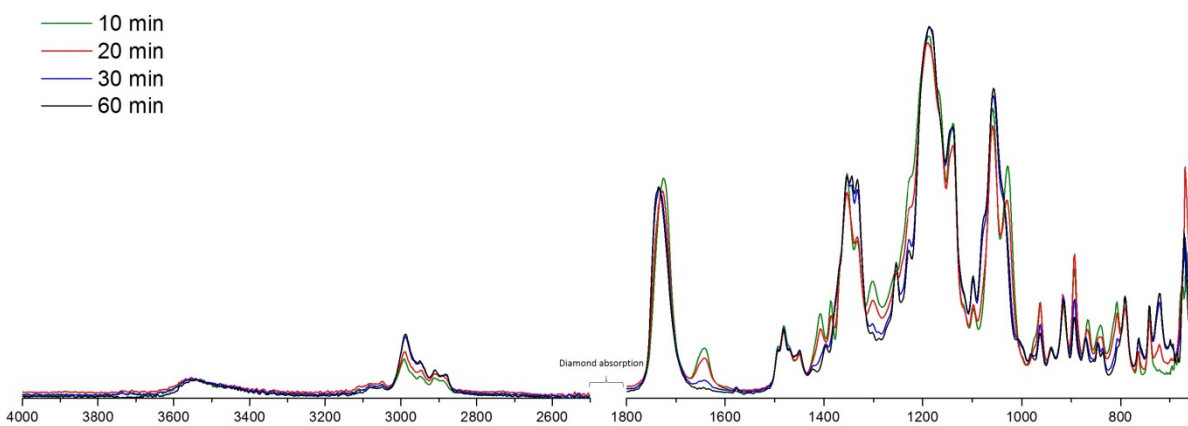

**Fig. 1** FT-IR spectra of the reaction course of cyclopentadiene (5 mmol) with diethyl maleate (5 mmol) in the presence of the D-glucose-based ionic liquid VI in catalytic amounts (0.20 mmol).

**FT-IR spectra of tetraalkylammonium bistriflamides (IV a-c, VIII-XII):**

**(2-D-glucopyranosyloxyethyl)trimethylammonium bistriflamide (V):**

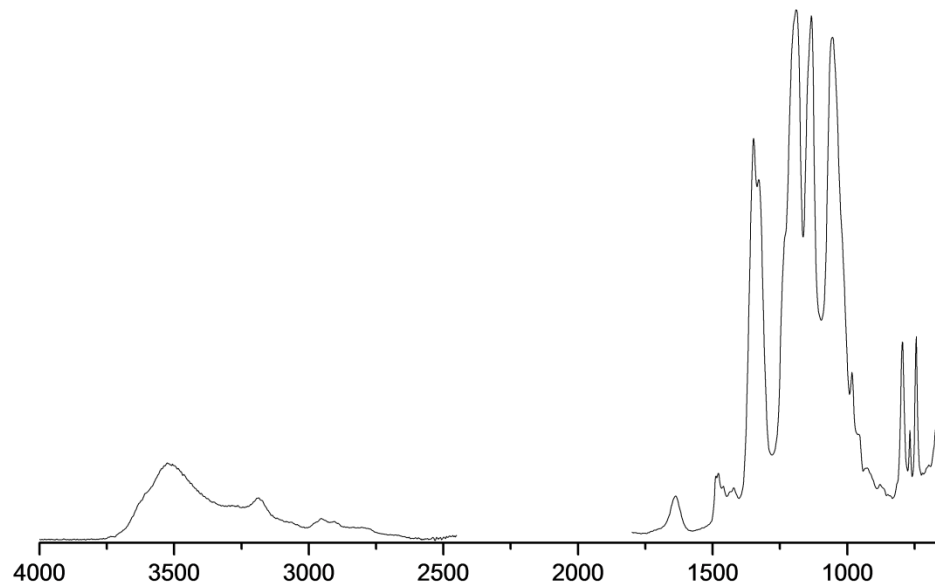

**(2-D-glucopyranosyloxypropyl)trimethylammonium bistriflamide (VI):**

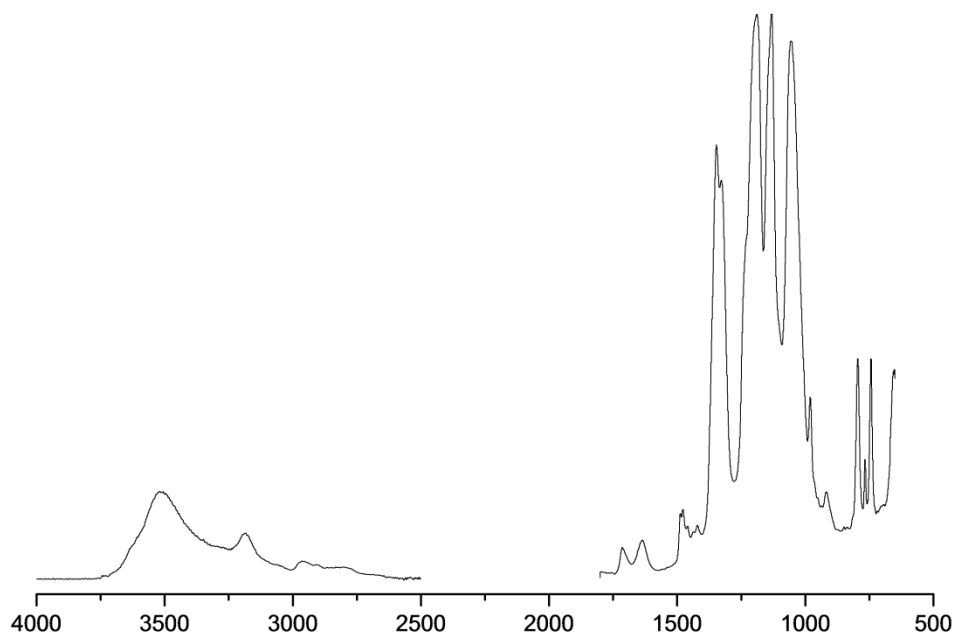

**(2-D-glucopyranosyloxy-2-hydroksypropyl)trimethylammonium bistriflamide (VII):**

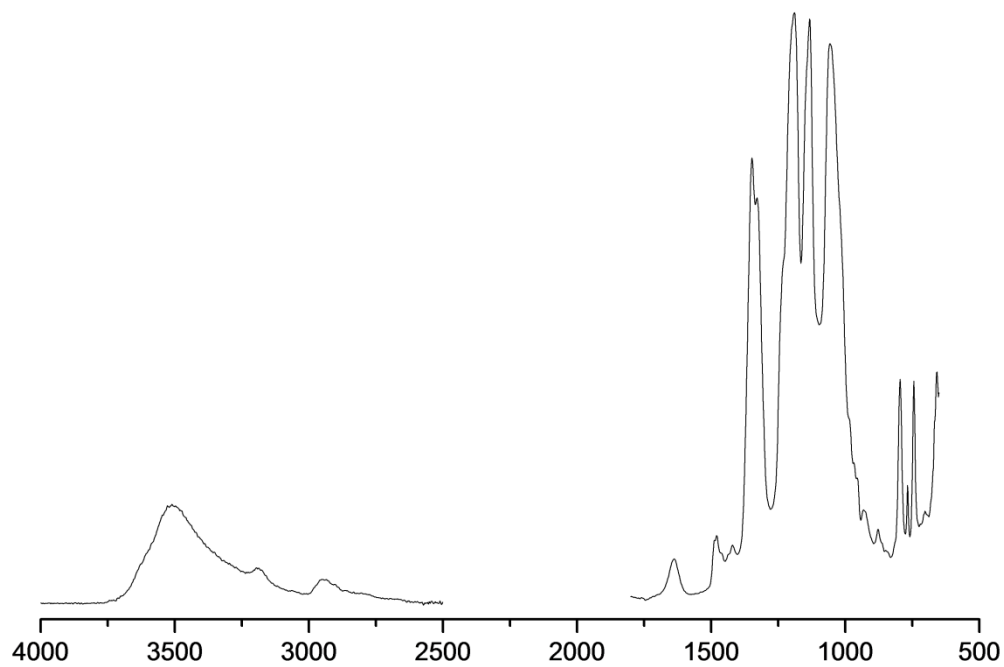

***N*-[(2,3-dihydroxy)prop-1-yl]-*N,N,N*-trimethylammonium bistriflamide (VIII):**

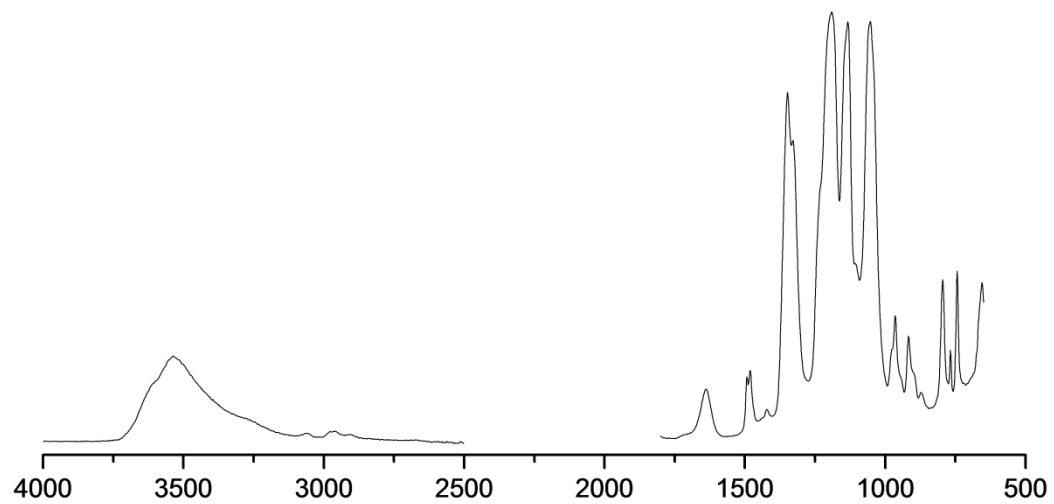

***N*-[(2,3-dihydroxy)prop-1-yl]-*N,N,N*-triethylammonium bistriflamide (IX):**

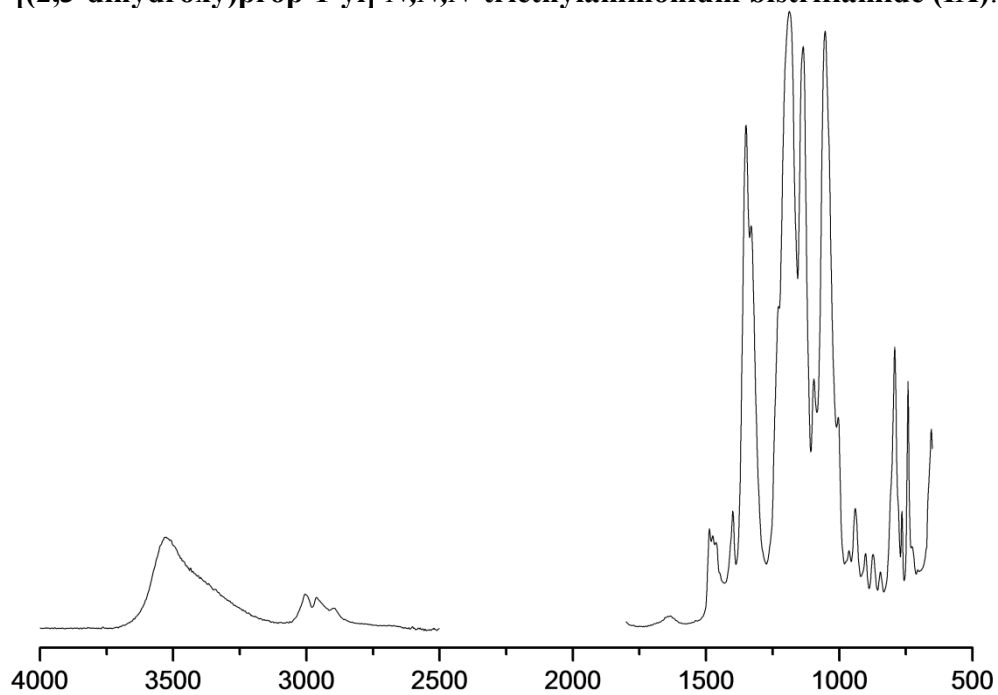

***N*-[(2,3-dihydroxy)prop-1-yl]-*N,N,N*-tributylammonium bistriflamide (X):**

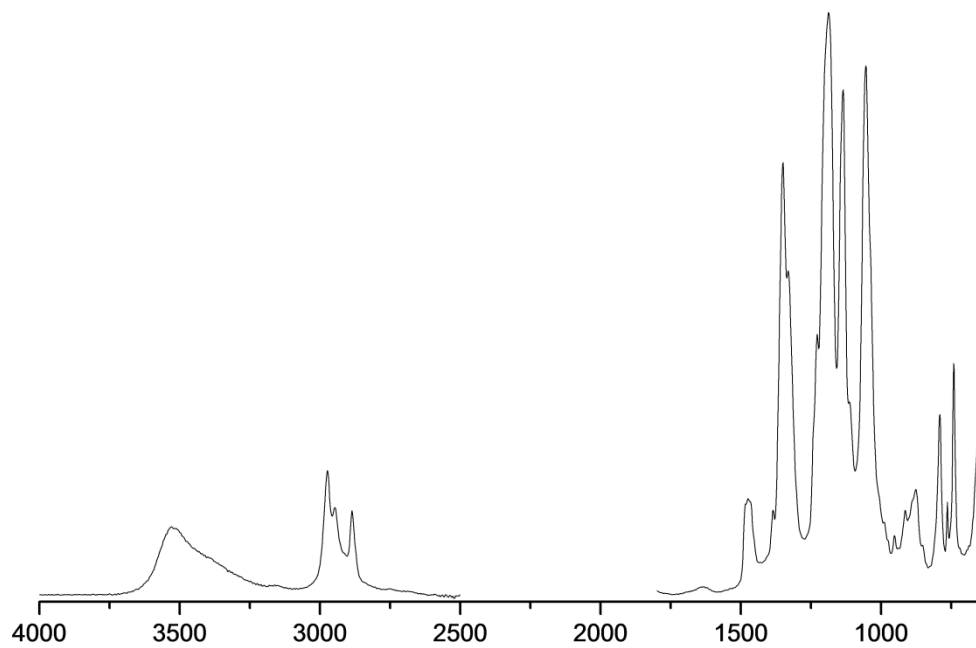

Supplement: c4gc00380b1.pdf [file c4gc00380b1.pdf]
